# Supplementary material for: Jacalin Bound Plasma O-Glycoproteome and Reduced Sialylation of Alpha 2-HS Glycoprotein (A2HSG) in Rheumatoid Arthritis Patients
Source: PLoS One. 2012 Oct 3;7(10):e46374. doi: 10.1371/journal.pone.0046374 (PMC3463590; doi:10.1371/journal.pone.0046374)
Supplement: Table S2 — Densitometric analysis of images. Densitometric data of ponceau stained and anti-A2HSG and anti-ITIH4 blot images of individual controls and RA patients as calculated by alpha digidoc algorithm. (XLS) [file pone.0046374.s004.xls]

## Sheet: Sheet1
				A2HSG (Fetuin)
Control	Con 1	Con 2	Con 3	Con 4	Con 5	Con 6	Con 7	Con 8	Con 9
Total lane density after Ponceau staining (a)	3024402	2830874	3470958	3256200	2756787	3090943	2914135	2896047	3260600
Density of A2HSG (fetuin) by anti-A2HSG antibody blot (b)	573183	593190	590121	400575	377496	286230	409840	328055	420665
% relative density of A2HSG (b/a*100)	18.9519	20.9543	17.0017	12.3019	13.6933	9.26028	14.0639	11.3277	12.9015
RA patients	RA 1	RA2	RA3	RA 4	RA 5	RA 6	RA 7	RA 8	RA 9
Total lane density after Ponceau (a)	3547745	3140410	2783840	3112461	2865120	3370367	3659373	4266822	7292467
Density of A2HSG (fetuin) by anti-A2HSG antibody blot (b)	347472	146335	176085	137760	256620	246558	356643	370875	342022
% relative density of A2HSG (b/a*100)	9.79417	4.65974	6.32526	4.42608	8.95669	7.31546	9.74601	8.69207	4.69007
			ITIH4
Control	Con 1	Con 2	Con 3	Con 4	Con 5	Con 6	Con 7	Con 8	Con 9
Total lane density after Ponceau staining (a)	2523350	3102991	2604650	2385882	2665041	2899962	2685250	2774655	3248025
Density of ITIH4 by anti-ITIH4 antibody blot (b)	249084	116493	175863	86623	61845	157976	137950	105369	305025
% relative density of ITIH4 (b/a*100)	9.87116	3.75422	6.75189	3.63065	2.3206	5.44752	5.13732	3.79755	9.39109
RA patients	RA 1	RA2	RA3	RA 4	RA 5	RA 6	RA 7	RA 8	RA 9
Total lane density after Ponceau staining (a)	2576125	2515500	2274012	3126487	2549946	3193008	3259529	3246750	3103783
Density of ITIH4 by anti-ITIH4 antibody blot (b)	261440	136800	233496	195804	344520	530212	447720	493430	280665
% relative density of ITIH4 (b/a*100)	10.1486	5.43828	10.268	6.26275	13.5109	16.6054	13.7357	15.1977	9.04267
